# Supplementary material for: New Synthetic Lethality Re-Sensitizing Platinum-Refractory Cancer Cells to Cisplatin In Vitro: The Rationale to Co-Use PARP and ATM Inhibitors
Source: MDPI journal article supplement (doi:10.3390/ijms222413324), 2021-12-11
Supplement: s1 [file s1]

## **Supplementary Materials**

### **New synthetic lethality re-sensitizing platinum-refractory cancer cells to cisplatin *in vitro*: the rationale to co-use PARP and ATM inhibitors**

Watson P. Folk, Alpana Kumari, Tetsushi Iwasaki, Erica K. Cassimere, Slovénie Pyndiah,  
Elizabeth Martin, Kelly Homlar, Daitoku Sakamuro\*

\*Corresponding author

- Figure S1:** Ectopically expressed TP53 displays robust growth suppression in the presence of abundant BIN1 in DU145 prostate cancer cells.
- Figure S2:** Phase-contrast microscopy demonstrated that the cisplatin sensitivity obtained by si-MDC1 was counterbalanced by z-VAD-fmk (20  $\mu$ M) in the LNCaP/sh-BIN1 cells.
- Figure S3:** Western blotting analysis probed with an anti-poly(ADP-ribosyl)ated (i.e., PARylated) carbohydrate monoclonal antibody (anti-PAR).
- Figure S4:** The mutation ratio of the *TP53*, *ATM*, *PARP1*, *MDC1*, *RNF8*, *BIN1*, and *MYC* genes in human solid cancer tissues.
- Table S1:** The chemicals used in this study
- Table S2:** The primary antibodies used in this study
- Table S3:** The si-RNAs/sh-RNAs used in this study

## Supplementary Figures

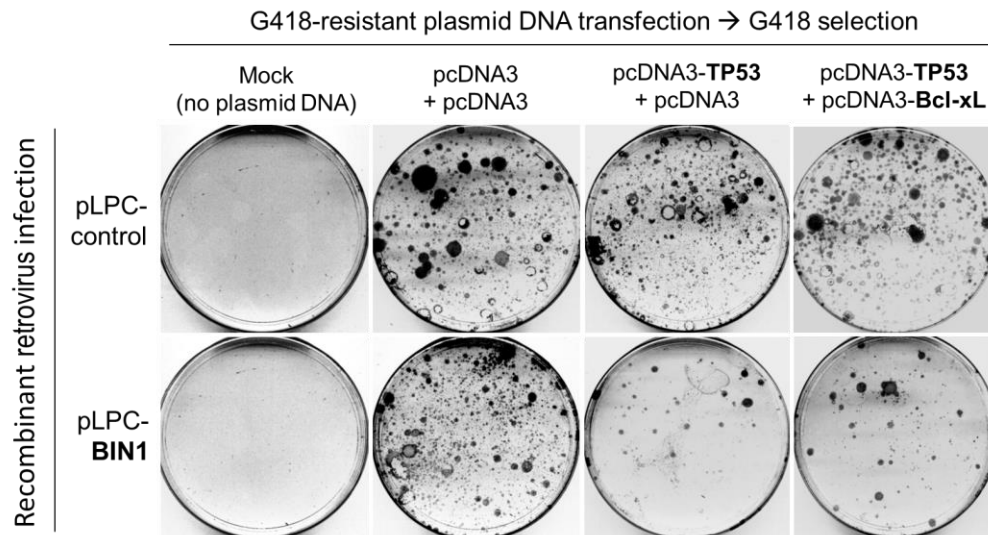

**Figure S1** Ectopically expressed TP53 displays robust growth suppression in the presence of abundant BIN1 in DU145 prostate cancer cells. DU145 prostate cancer cells constitutively infected with the human full-length BIN1 cDNA-expressing recombinant retrovirus (pLPC-BIN1) were transfected with each indicated pcDNA3-based plasmid DNA vector (G418-resistant). Plasmid-transfected cells were incubated for 2-3 weeks in the presence of G418 (500 µg/mL) under optimal culture conditions. G418-resistant colonies that appeared on tissue culture plates were fixed briefly with 100% methanol and then stained with Giemsa (Invitrogen, Carlsbad, California, USA) according to the protocol recommended by the vendor. Besides rapid induction of G1 cell-cycle arrest when overexpressed or in response to DNA damage, the TP53 tumor suppressor (also known as p53) activates apoptosis that would be counteracted by Bcl-xL protein [S1]. Bcl-xL (B-cell lymphoma-extra-large) protein acts as an anti-apoptotic protein by blocking the release of cytochrome c from mitochondria [S2].

[S1] Vaseva AV, Moll UM (2009) The mitochondrial p53 pathway. *Biochim Biophys Acta* 1787: 414-420.  
<https://doi.org/10.1016/j.bbabbio.2008.10.005>

[S2] Korsmeyer SJ. (1995) Regulators of Cell Death. *Trends in Genetics* 11: 101-105.  
[https://doi.org/10.1016/S0168-9525\(00\)89010-1](https://doi.org/10.1016/S0168-9525(00)89010-1)

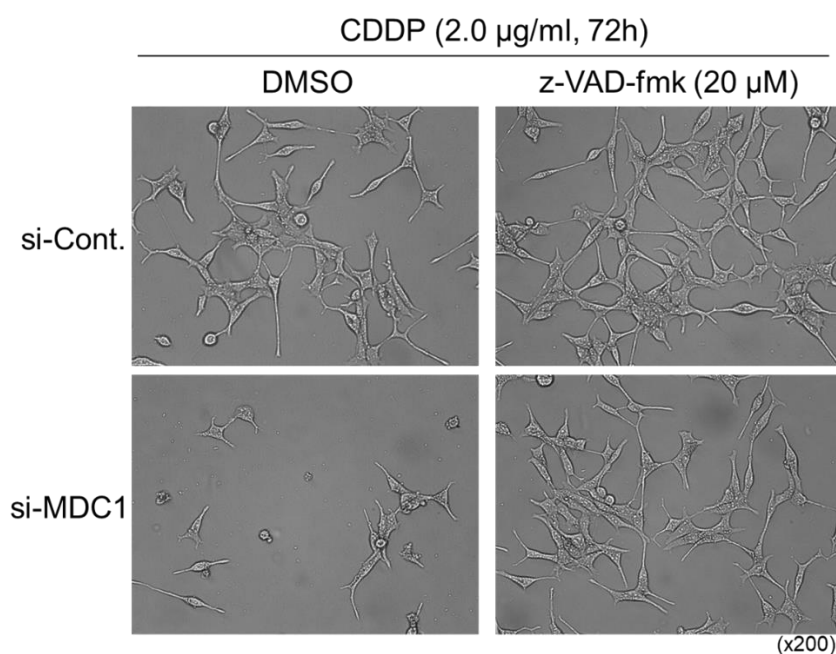

**Figure S2** Phase-contrast microscopy demonstrated that the cisplatin sensitivity obtained by si-MDC1 was counterbalanced by z-VAD-fmk (20  $\mu$ M) in the LNCaP/sh-BIN1 cells. This morphological observation indicates that MDC1 depletion elicits cisplatin-induced apoptosis in a caspase-dependent manner, thereby counteracting the cisplatin resistance by a BIN1 loss.

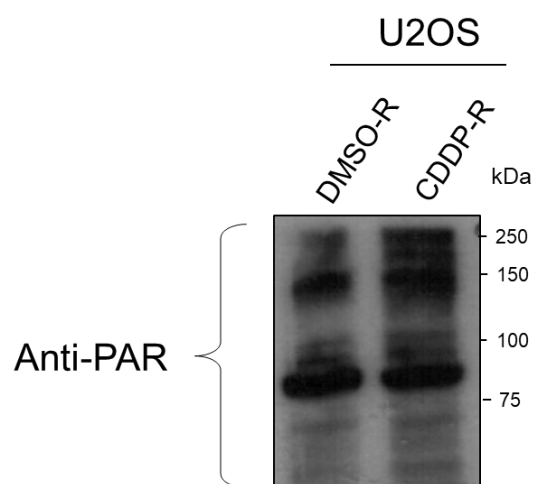

**Figure S3** Western blotting analysis probed with an anti-poly(ADP-ribosyl)ated (i.e., PARylated) carbohydrate monoclonal antibody (anti-PAR). This observation indicates that endogenous PARP1 activity increases during the process for cancer-cell survival in the presence of cisplatin.

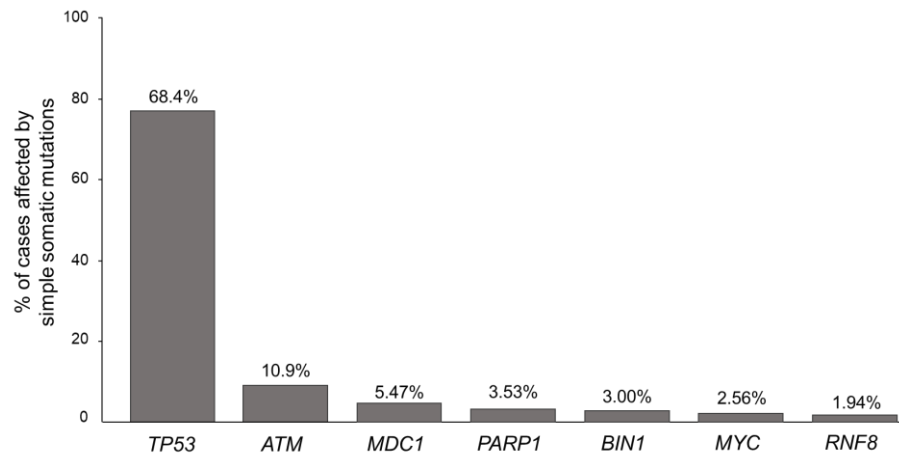

**Figure S4. The mutation ratio of the *TP53*, *ATM*, *PARP1*, *MDC1*, *RNF8*, *BIN1*, and *MYC* genes in human solid cancer tissues.** The updated data of the gene mutation ratios in human cancer tissues derived from various organs, such as lung, breast, bone marrow, colon, nervous system, ovary, kidney, skin, and prostate, are available at the US National Cancer Institute (NCI) Genomic DNA Commons (<https://gdc.cancer.gov/>). Simple somatic gene abnormality includes missense mutations, frameshift mutations, start-loss mutations, stop-loss mutations, and stop-gained mutations.

## Supplementary Tables

Table S1: The chemicals used in this study

| Chemical                           | Catalog number | Company                  |
|------------------------------------|----------------|--------------------------|
| Dimethyl sulfoxide (DMSO)          | sc-358801      | Santa Cruz Biotechnology |
| Olaparib (PARP inhibitor)          | sc-302017      | Santa Cruz Biotechnology |
| 4'-6-diamino-2-phenylindole (DAPI) | D8417          | Sigma-Aldrich            |
| G418 (Geneticin)                   | #10131027      | Thermo Fisher Scientific |
| Cisplatin                          | P4394          | Sigma-Aldrich            |
| Bleomycin                          | B-2434         | Sigma-Aldrich            |
| Z-VAD-fmk                          | V-116          | Sigma-Aldrich            |
| KU-60019 (ATM inhibitor)           | #4176          | Tocris Bioscience        |

Table S2: The primary antibodies used in this study

| Antigen detected     | Catalog number | Company                   |
|----------------------|----------------|---------------------------|
| BIN1 (clone 99D)     | sc-13575       | Santa Cruz Biotechnology  |
| BIN1 (clone D3)      | sc-74486       | Santa Cruz Biotechnology  |
| PARP1                | sc-7150        | Santa Cruz Biotechnology  |
| PAR                  | 4335-MC-100    | Trevigen                  |
| $\gamma$ H2AX        | #2577          | Cell Signaling Technology |
| ATM                  | 05-513         | Millipore                 |
| MDC1                 | ab114143       | Abcam                     |
| Phospho-MDC1         | ab35967        | Abcam                     |
| RNF8                 | sc-271462      | Santa Cruz Biotechnology  |
| MYC (9E10)           | MA1-980        | Thermo Fisher Scientific  |
| TP53 (DO-1)          | sc-126         | Santa Cruz Biotechnology  |
| Phospho-TP53 (Ser15) | #9284          | Cell Signaling Technology |
| ERCC1 (D-10)         | sc-17809       | Santa Cruz Biotechnology  |
| GAPDH                | sc-322233      | Santa Cruz Biotechnology  |
| $\beta$ -Actin       | A2228          | Sigma-Aldrich             |

Table S3: The si-RNAs/sh-RNAs used in this study

| sh-/si-RNA          | Catalog number | Company                  |
|---------------------|----------------|--------------------------|
| BIN1 sh-RNA (human) | sc-29804-SH    | Santa Cruz Biotechnology |
| MDC1 si-RNA (human) | sc-43917       | Santa Cruz Biotechnology |
| RNF8 si-RNA (human) | sc-61484       | Santa Cruz Biotechnology |
